# Supplementary material for: A Thermolabile Aldolase A Mutant Causes Fever-Induced Recurrent Rhabdomyolysis without Hemolytic Anemia
Source: PubMed Central journal article supplement (PMC4230727; doi:10.1371/journal.pgen.1004711), 2014-11-13
Supplement: pgen.1004711.s005.pdf [file pgen.1004711.s005.pdf]

**Table S1. Candidate genes with exome analysis.**

| <b>Gene</b> | <b>Chromosome</b> | <b>Description</b>                                                                         |
|-------------|-------------------|--------------------------------------------------------------------------------------------|
| NBPF10      | 1                 | neuroblastoma breakpoint family, member 10 [Source:HGNC Symbol;Acc:31992]                  |
| MLXIP       | 12                | MLX interacting protein [Source:HGNC Symbol;Acc:17055]                                     |
| CLIP1       | 12                | CAP-GLY domain containing linker protein 1 [Source:HGNC Symbol;Acc:10461]                  |
| TDRD9       | 14                | tudor domain containing 9 [Source:HGNC Symbol;Acc:20122]                                   |
| TCF25       | 16                | transcription factor 25 (basic helix-loop-helix) [Source:HGNC Symbol;Acc:29181]            |
| ALDOA       | 16                |                                                                                            |
| CCDC150     | 2                 | coiled-coil domain containing 150 [Source:HGNC Symbol;Acc:26834]                           |
| KCNJ6       | 21                | potassium inwardly-rectifying channel, subfamily J, member 6 [Source:HGNC Symbol;Acc:6267] |
| CRIPAK      | 4                 | cysteine-rich PAK1 inhibitor [Source:HGNC Symbol;Acc:26619]                                |
| DCHS2       | 4                 | dachsous 2 (Drosophila) [Source:HGNC Symbol;Acc:23111]                                     |
