# Supplementary material for: A Thermolabile Aldolase A Mutant Causes Fever-Induced Recurrent Rhabdomyolysis without Hemolytic Anemia
Source: PubMed Central journal article supplement (PMC4230727; doi:10.1371/journal.pgen.1004711), 2014-11-13
Supplement: pgen.1004711.s006.pdf [file pgen.1004711.s006.pdf]

**Table S2. Aldolase A activity in patient myoblasts treated with Glycerol, betaine and Benzylhydantoin.**

|                             | AldoA (U/ $\mu$ g protein) $\pm$ SD |
|-----------------------------|-------------------------------------|
| Basal condition             | 1.08 $\pm$ 0,1                      |
| Glycerol 100 mM             | 1.01 $\pm$ 0,2                      |
| Betaine 10 nM               | 0.92 $\pm$ 0,2                      |
| Betaine 50 nM               | 0.91 $\pm$ 0,1                      |
| Benzylhydantoin 130 $\mu$ M | 0.82                                |
