# Supplementary material for: A Thermolabile Aldolase A Mutant Causes Fever-Induced Recurrent Rhabdomyolysis without Hemolytic Anemia
Source: PubMed Central journal article supplement (PMC4230727; doi:10.1371/journal.pgen.1004711), 2014-11-13
Supplement: pgen.1004711.s007.pdf [file pgen.1004711.s007.pdf]

**Table S3. Increased respiratory chain activities in skeletal muscle of the patient and similar respiratory chain activities in myoblasts of the patient and control, in basal and pro-inflammatory conditions. T+I : TNF- $\alpha$  + IL-1 $\beta$ .**

| <b>Frozen skeletal muscle</b>                               | <b>Control</b> |            | <b>Patient</b> |            |
|-------------------------------------------------------------|----------------|------------|----------------|------------|
| <b>Spectrophotometric activities (nmol/min/mg proteins)</b> |                |            |                |            |
| Complex I                                                   | 17 $\pm$ 4     |            | 56             |            |
| Complex II                                                  | 35 $\pm$ 7     |            | 105            |            |
| Complex III                                                 | 300 $\pm$ 56   |            | 600            |            |
| Complex IV                                                  | 150 $\pm$ 30   |            | 300            |            |
| Citrate synthase                                            | 96 $\pm$ 18    |            | 228            |            |
| Lactate dehydrogenase                                       | 1758 $\pm$ 415 |            | 3800           |            |
| <b>Myoblasts</b>                                            | <b>Control</b> |            | <b>Patient</b> |            |
| <b>Spectrophotometric activities (nmol/min/mg proteins)</b> | <b>Base</b>    | <b>T+I</b> | <b>Base</b>    | <b>T+I</b> |
| Complex I                                                   | 13.8           | 11.4       | 10.5           | 10.4       |
| Complex II                                                  | 15.5           | 13.7       | 11.9           | 11.2       |
| Complex III                                                 | 168.4          | 176.7      | 156.8          | 147.1      |
| Complex IV                                                  | 46.3           | 42.8       | 35.7           | 35.3       |
| Citrate synthase                                            | 51.8           | 51.2       | 44.6           | 44.8       |
| Lactate dehydrogenase                                       | 9276.7         | 9875.3     | 8538.3         | 8882.7     |
