# Supplementary material for: A Thermolabile Aldolase A Mutant Causes Fever-Induced Recurrent Rhabdomyolysis without Hemolytic Anemia
Source: PubMed Central journal article supplement (PMC4230727; doi:10.1371/journal.pgen.1004711), 2014-11-13
Supplement: pgen.1004711.s008.pdf [file pgen.1004711.s008.pdf]

**Table S4. Normal fatty acid oxidation in patient myoblasts compared to control, in basal and pro-inflammatory conditions (TNF- $\alpha$  + IL-1 $\beta$ ).**

|                              | Patient          |                             | Control          |                             |
|------------------------------|------------------|-----------------------------|------------------|-----------------------------|
|                              | Basal conditions | Pro-inflammatory conditions | Basal conditions | Pro-inflammatory conditions |
| <b>200 nmol of substrate</b> |                  |                             |                  |                             |
| C4d5 Butyryl- / IsobutyrylCn | 564              | 631                         | 579              | 570                         |
| C6d5 HexanoylCn              | 59               | 35                          | 90               | 87                          |
| C8d5 OctanoylCn / ValproylCn | 23               | 30                          | 128              | 117                         |
| C10d5 DecanoylCn             | 85               | 63                          | 295              | 239                         |
| C12d5 LauroylCn              | 133              | 109                         | 214              | 185                         |
| C14d5 MyristoylCn            | 194              | 168                         | 210              | 197                         |
| C16d5 PalmitoylCn            | 678              | 889                         | 723              | 780                         |
| <b>50 nmol of substrate</b>  |                  |                             |                  |                             |
| C4d5 Butyryl- / IsobutyrylCn | 481              | 479                         | 326              | 401                         |
| C6d5 HexanoylCn              | 32               | 36                          | 55               | 65                          |
| C8d5 OctanoylCn / ValproylCn | 25               | 23                          | 92               | 88                          |
| C10d5 DecanoylCn             | 41               | 47                          | 159              | 180                         |
| C12d5 LauroylCn              | 53               | 38                          | 49               | 68                          |
| C14d5 MyristoylCn            | 49               | 27                          | 21               | 29                          |
| C16d5 PalmitoylCn            | 205              | 114                         | 104              | 119                         |
